# Supplementary material for: Diabetes Fact Sheet in Korea 2021
Source: PubMed Central journal article supplement — Diabetes Metab J. 2022 May 25;46(3):417–26. doi: 10.4093/dmj.2022.0106 (PMC9171160; doi:10.4093/dmj.2022.0106), 2022-05-25
Supplement: dmj-2022-0106-suppl3.pdf [file dmj-2022-0106-suppl3.pdf]

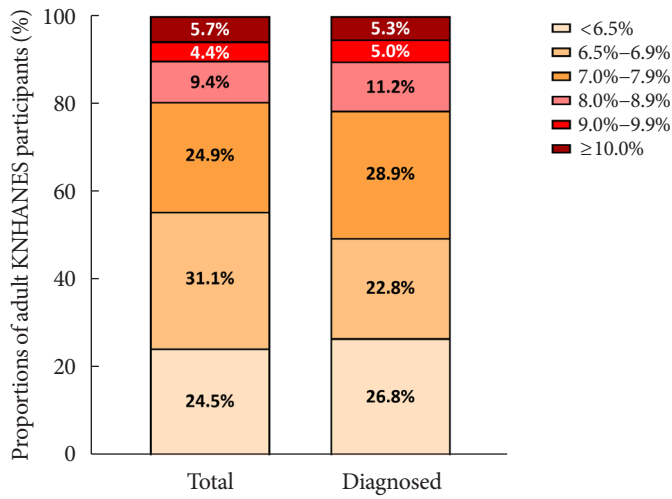

**Supplementary Fig. 1.** Distribution of glycosylated hemoglobin levels among adults Korea National Health and Nutrition Examination Survey (KNHANES) participants with total diabetes mellitus and diagnosed diabetes mellitus, 2019 to 2020.
